# Supplementary material for: BRSK2 induced by nutrient deprivation promotes Akt activity in pancreatic cancer via downregulation of mTOR activity
Source: PubMed Central journal article supplement (PMC5546509; doi:10.18632/oncotarget.17965), 2017-05-18
Supplement: oncotarget-08-44669-s001.pdf [file oncotarget-08-44669-s001.pdf]

## BRSK2 induced by nutrient deprivation promotes Akt activity in pancreatic cancer via downregulation of mTOR activity

### SUPPLEMENTARY MATERIALS

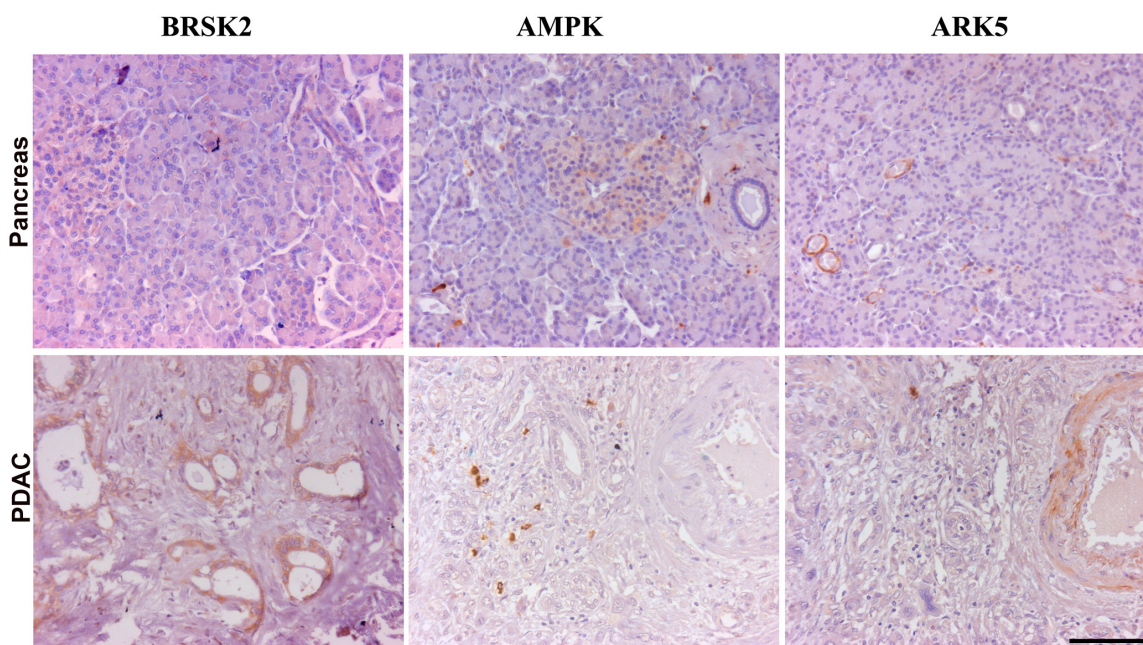

Supplementary Figure 1: The expression patterns of BRSK2, ARK5 and AMPK in normal pancreas and in PDACs. Scale bar, 200 $\mu$ m.

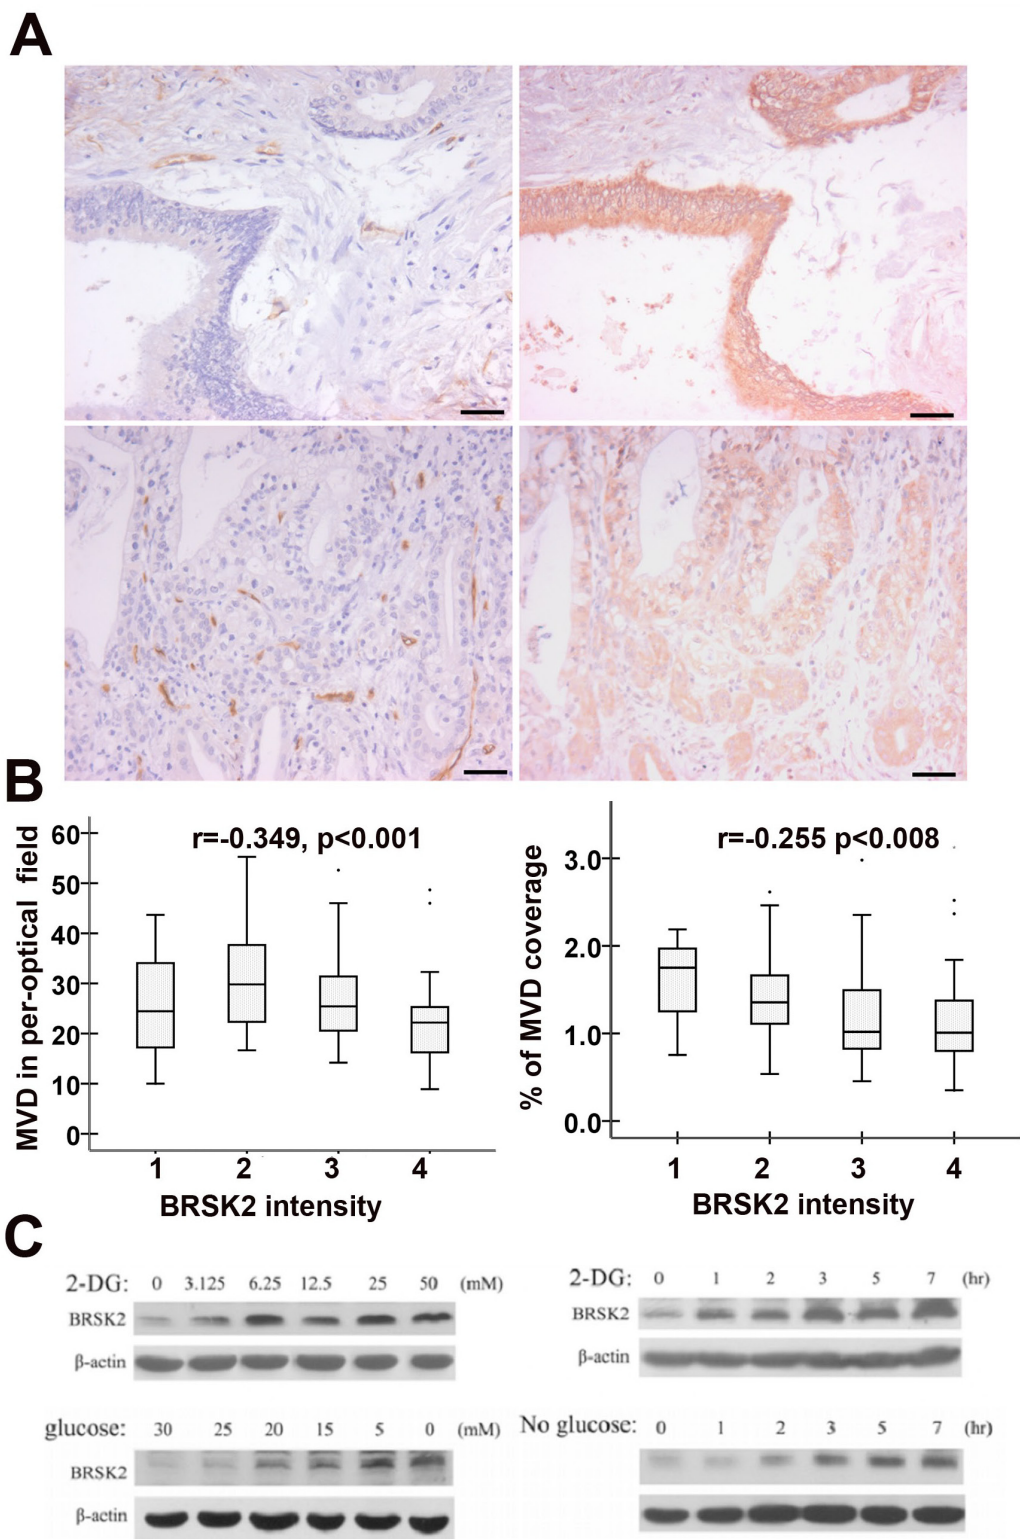

**Supplementary Figure 2: BRSK2 is a typical AMPK family member that senses the nutrient supply in PDAC tumor milieu. (A and B)** Representative images of CD34 and BRSK2 staining in two cases of PDAC. BRSK2 expression level is inversely related to microvessel density (MVD) and microvessel coverage fraction in pancreatic cancer ( $r = -0.349, p < 0.001$ ;  $r = -0.255, p < 0.008$ ). Scale bar, 50 $\mu$ m. **(C)** *In vitro* treatments of glucose deprivation induced BRSK2 upregulation in PANC-1 cells.



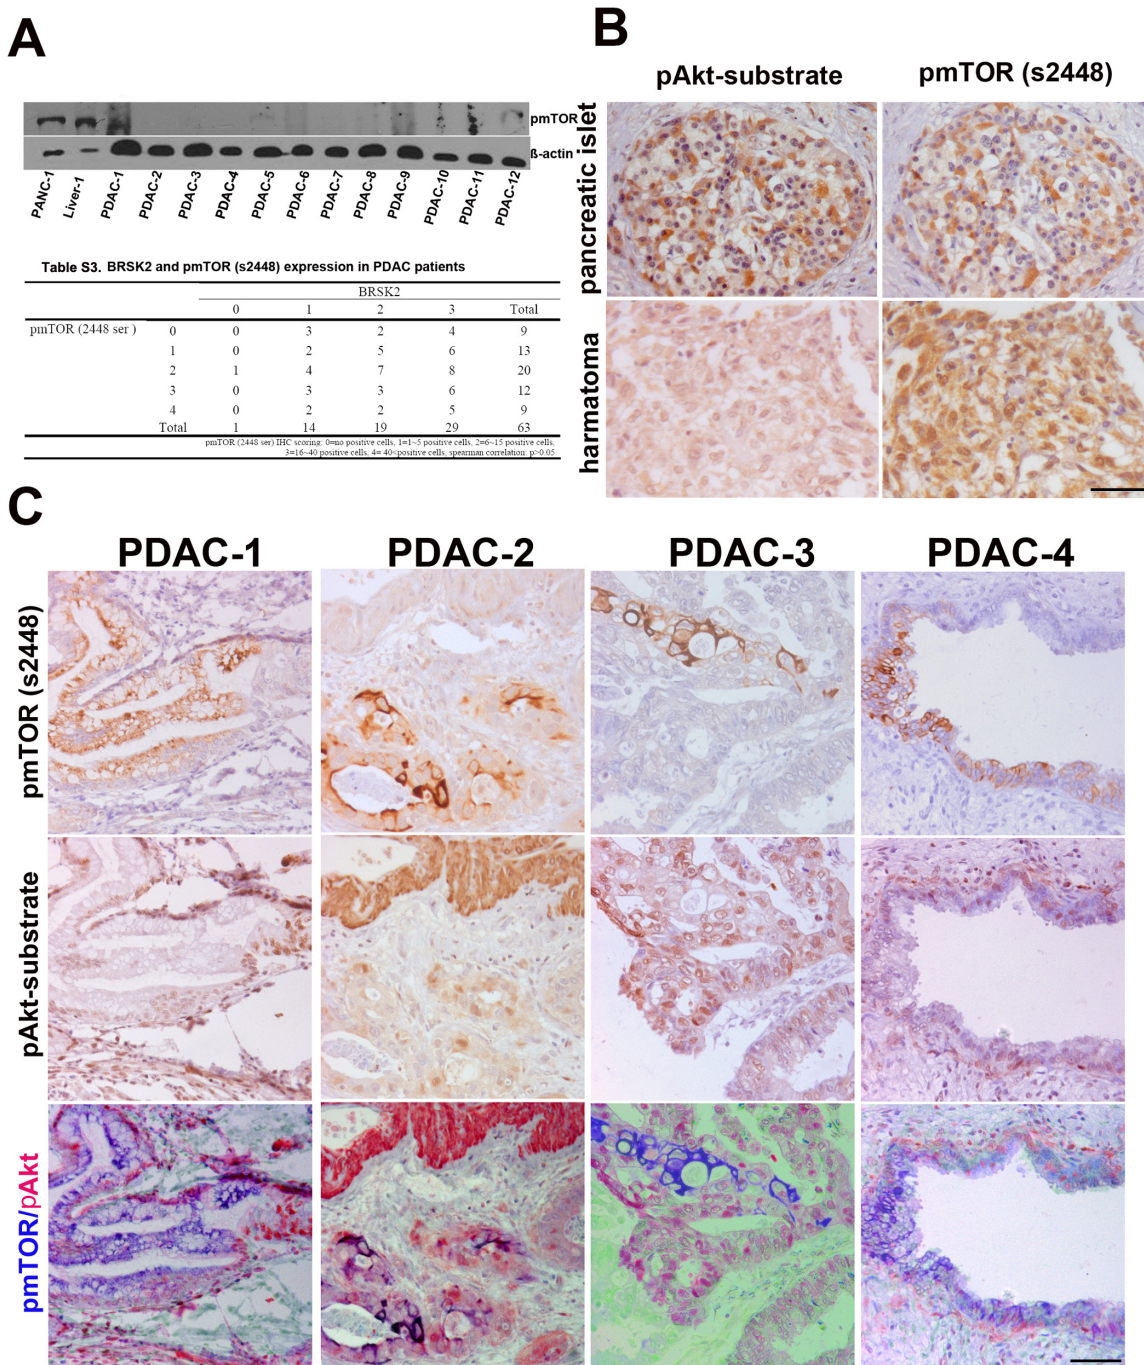

**Supplementary Figure 3: Levels of pAkt substrate signal and pmTOR signal were negatively correlated in PDAC tissues. (A)** The detection of pmTOR (Ser2448) expression in PDAC patients tissues by western blotting and IHC. Contrary to liver and PANC-1 cells, no expression of pmTOR was detected in PDAC tissues by western blotting, **(B and C)** pmTOR (Ser2448) and pAkt substrate expression patterns in consecutive sections of pancreatic islets, harmatoma tissues **(B)** and four cases of PDAC **(C)**. Contrary to pancreatic islets, the negative correlation of pAkt substrate signal and pmTOR signal were widely existed through both PDAC tissues and harmatoma. scale bar, 100µm.

**A**

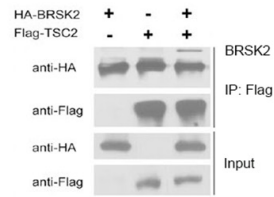

**B**

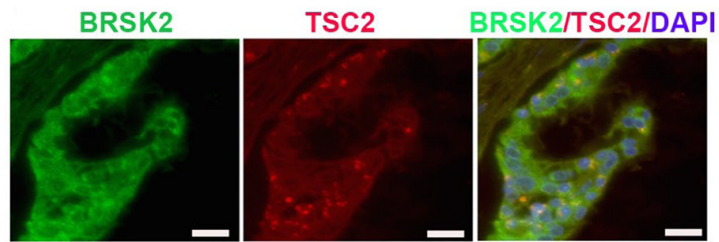

**Supplementary Figure 4: BRSK2 and TSC2 interact with each other *in vitro* and colocalize in tumor tissues. (A)** TSC2 and BRSK2 could interact with each other by *in vitro* immunoprecipitation assay. **(B)** BRSK2 and TSC2 were colocalized in cancer neoplastic cell of PDAC tissues. Scale bar: 10  $\mu$ m.

Supplementary Table 1: Baseline clinical characteristics of PDAC and IPMN patients

|                       |           | PDAC n (%)    | IPMN n (%)    |
|-----------------------|-----------|---------------|---------------|
| Gender                | Male      | 67/102 (65.7) | 16/21 (76.2)  |
|                       | Female    | 35/102 (34.3) | 5/21 (23.8)   |
| Age                   | <60       | 40/102 (39.2) | 10/21 (47.6)  |
|                       | >60       | 62/102 (60.8) | 11/21 (52.4)  |
| Tumor location        | Head      | 75/102 (73.5) | 21/21 (100.0) |
|                       | Body-tail | 21/102 (20.6) | 0/21 (0)      |
|                       | Entire    | 6/102 (5.9)   | 0/21(0)       |
| Tumor stage           | Tis+T1+T2 | 22/102 (20.8) | 14/21 (66.7)  |
|                       | T3+T4     | 80/102 (79.2) | 7 (33.3)      |
| Regional lymph status | N.A       | 19/102 (18.6) | 4/21 (20.0)   |
|                       | No        | 38/102 (37.3) | 13/21 (65.0)  |
|                       | Yes       | 45/102 (44.1) | 3/21 (15.0)   |
| Distant metastases    | No        | 95/102 (93.1) | 21/21 (100.0) |
|                       | Yes       | 7/102 (6.9)   | 0/21 (0)      |
| Nerve invasion        | No        | 27/102 (26.5) | 15/19 (78.9)  |
|                       | Yes       | 75/102 (73.5) | 4/19 (21.1)   |
| Vascular invasion     | No        | 64/102 (62.7) | 17/21 (89.5)  |
|                       | Yes       | 38/102 (37.3) | 2/21 (10.5)   |
| Living status         | lost      | 29/102 (28.4) | 2/21 (9.5)    |
|                       | live      | 12/102 (11.8) | 10/21 (47.6)  |
|                       | die       | 61/102 (59.8) | 9/21 (42.9)   |

Supplementary Table 2: The correlations between BRSK2 and clinical pathological parameters in IPMN

|                       |           | None  | Weak  | Moderate | Strong | p                                      |
|-----------------------|-----------|-------|-------|----------|--------|----------------------------------------|
|                       |           | Count | Count | Count    | Count  |                                        |
| Gender                | Male      | 0     | 5     | 5        | 6      | N.A                                    |
|                       | Female    | 0     | 2     | 1        | 2      |                                        |
| Age                   | <60       | 0     | 5     | 2        | 3      | N.A                                    |
|                       | >60       | 0     | 2     | 4        | 5      |                                        |
| Tumor location        | Head      | 0     | 7     | 6        | 8      | N.A                                    |
|                       | Body-tail | 0     | 0     | 0        | 0      |                                        |
|                       | Entire    | 0     | 0     | 0        | 0      |                                        |
| Tumor stage           | Tis+T1+T2 | 0     | 6     | 4        | 4      |                                        |
|                       | T3+T4     | 0     | 1     | 2        | 4      |                                        |
| Regional lymph status | N.A       | 0     | 1     | 1        | 2      | N.A                                    |
|                       | No        | 0     | 5     | 3        | 5      |                                        |
|                       | Yes       | 0     | 0     | 2        | 1      |                                        |
| Distant metastases    | No        | 0     | 7     | 6        | 8      | N.A                                    |
|                       | Yes       | 0     | 0     | 0        | 0      |                                        |
| Nerve invasion        | No        | 0     | 6     | 3        | 6      | >0.05                                  |
|                       | Yes       | 0     | 0     | 2        | 2      |                                        |
| Vascular invasion     | No        | 0     | 6     | 4        | 7      | >0.05                                  |
|                       | Yes       | 0     | 0     | 1        | 1      |                                        |
| Living status         | lost      | 0     | 1     | 0        | 1      | HR=2.984<br>95% CI<br>0.976-<br>14.434 |
|                       | live      | 0     | 5     | 2        | 3      |                                        |
|                       | die       | 0     | 1     | 4        | 4      |                                        |
